# Supplementary material for: Effects of EEG examination and ABA-therapy on resting-state EEG in children with low-functioning autism
Source: PubMed Central journal article supplement (PMC7321768; doi:10.3934/neuroscience.2020011), 2020-06-05
Supplement: neurosci-07-02-011-s01.pdf [file neurosci-07-02-011-s01.pdf]

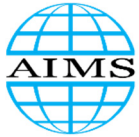

---

*Review*

## **Effects of EEG examination and ABA-therapy on resting-state EEG in children with low-functioning autism**

**Galina V. Portnova<sup>1,\*</sup>, Oxana Ivanova<sup>2</sup> and Elena V. Proskurnina<sup>3</sup>**

<sup>1</sup> Institute of Higher Nervous Activity and Neurophysiology of RAS, 5A Butlerova St., Moscow 117485, Russia

<sup>2</sup> FSBI Federal medical center Rosimushchestvo, 31 Kalanchevskaya str., 107078, Moscow, Russia

<sup>3</sup> Research Centre for Medical Genetics, 1 Moskvorechye St., Moscow 115522, Russia

\* **Correspondence:** Email: [caviter@list.ru](mailto:caviter@list.ru); Tel: +74953347000; Fax: +74997430056.

---

### **Supplementary Information**

Our test was based on the Information for Parents and Professionals on Behavioral Indicators of Tactile Defensiveness ([http://dyspraxiafoundation.org.uk/wp-content/uploads/2013/10/Tactile\\_Defensiveness.pdf](http://dyspraxiafoundation.org.uk/wp-content/uploads/2013/10/Tactile_Defensiveness.pdf)):

#### **1. Avoidance Responses to Touch Stimulation**

- Avoidance of certain styles or textures of clothing (e.g. scratchy or rough); or conversely an unusual preference for certain styles or textures of clothing (e.g. soft materials, long sleeved shirts)
- Avoidance of contact with other children, e.g. preference for standing at the end of line during assembly, staying at the edge of a group during story time etc.
- Avoidance of anticipated touch or from interactions involving touch, e.g. tendency to pull away or avoidance of touch to the face
- Avoidance of play activities involving tactile materials (e.g. sand, finger paints) or body contact, with a tendency to prefer solitary play
- Avoidance of going barefoot, especially in sand and grass (could result in tip-toe walking)
- Avoidance of a crowded environment, likes to stay under the table, behind the settee or under the staircase

## 2. Aversive Responses to Non-Painful Touch

- Aversion or struggle when picked up, hugged or cuddled
- Aversion to certain daily living tasks, e.g. having showers, cutting fingernails and hair and face washing
- Aversion to dental care and/or brushing teeth
- Aversion to being handled during daily activities, e.g. changing nappy or clothes, cleaning nose or face
- Aversion to being approached from behind. May rub skin or scratch area being touched

## 3. Emotional Responses to Touch Stimulation

- Becomes anxious and distressed when being physically close to people, e.g. during assembly, inside the dining hall, etc.
- Refusal to participate in certain social activities, e.g. going to a party or supermarket
- Responding verbally or with physical aggression to light touch to arms, face or legs, e.g. lashing out
- Objection, withdrawal or negative responses to touch contact, including that encountered in the context of intimate relationship even in a friendly or affectionate manner. A tendency to prefer to touch rather than to be touched. Some children may seek firm touch in order to modulate the level of defensiveness.

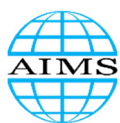

AIMS Press

© 2020 the Author(s), licensee AIMS Press. This is an open access article distributed under the terms of the Creative Commons Attribution License (<http://creativecommons.org/licenses/by/4.0>)
